# Supplementary material for: Model oxide supported MoS2 HDS catalysts: structure and surface properties
Source: Royal Society of Chemistry journal article supplement (doi:10.1039/c0cy00050g), 2011-01-01
Supplement: c0cy00050g.pdf [file c0cy00050g.pdf]

# Model oxide supported MoS<sub>2</sub> HDS catalysts: structure and surface properties

Federico Cesano<sup>a</sup>, Serena Bertarione<sup>a</sup>, Andrea Piovano<sup>a</sup>, Giovanni Agostini<sup>a</sup>, Mohammed Mastabur Rahman<sup>a</sup>, Elena Groppo<sup>a</sup>, Francesca Bonino<sup>a</sup>, Domenica Scarano<sup>a</sup>, Carlo Lamberti<sup>a</sup>, Silvia Bordiga<sup>a</sup>, Luciano Montanari<sup>b</sup>, Lucia Bonoldi<sup>b</sup>, Roberto Millini<sup>b</sup> and Adriano Zecchina<sup>\*a</sup>

<sup>a</sup>Department of Inorganic, Physical and Materials Chemistry, NIS Centre of Excellence, and Centre of Reference INSTM, University of Turin, Via P. Giuria 7, I-10125, Torino, Italy

<sup>b</sup>Eni S.p.A., Refining & Marketing Division, Research and Technological Development, Research Center, Via Maritano 26, I-20097 San Donato Milanese (MI), Italy

## Supporting information

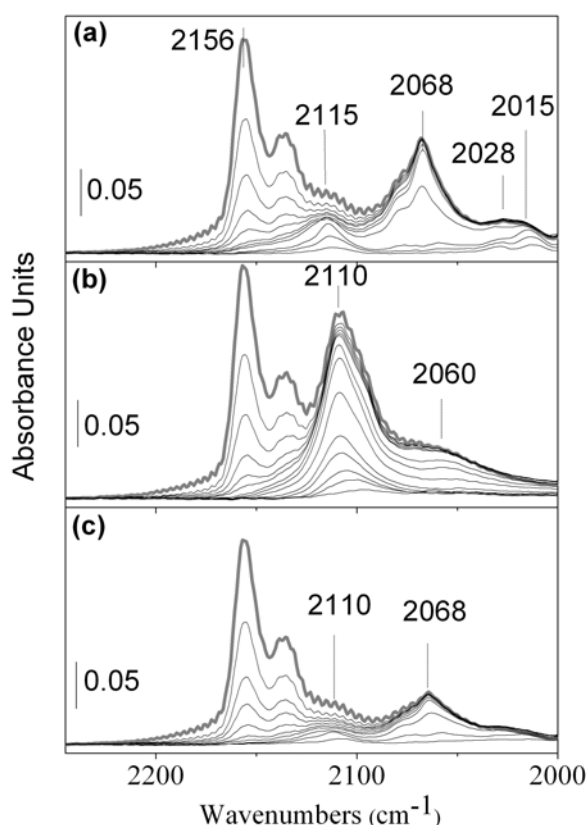

**Figure SI 1.** FTIR spectra of CO adsorbed at 77 K on MoS<sub>2</sub>/SiO<sub>2</sub> sample outgassed at 673 K **(a)**, H<sub>2</sub> reduced at 673 K **(b)** and treated in H<sub>2</sub>S atmosphere at 673 K **(c)**. The evolution of the spectra upon decreasing coverages ( $\theta$ ) is reported ( $\theta_{\max} = 20$  mbar, bold grey curve).

\* Corresponding author. e-mail: [adriano.zecchina@unito.it](mailto:adriano.zecchina@unito.it). Fax: +39 011 6707855 Tel: +39 011 6707860
